# Supplementary material for: Respiratory Syncytial Virus Sequesters NF-κB Subunit p65 to Cytoplasmic Inclusion Bodies To Inhibit Innate Immune Signaling
Source: PubMed Central journal article supplement (PMC7592213; doi:10.1128/jvi.01380-20), 2020-10-27
Supplement: JVI.01380-20-s0003.pdf [file JVI.01380-20-s0003.pdf]

### **Supplementary figure legends.**

**Supplementary video 1: Animated projection of RSV IBs.** MDBK cells infected with bRSV; nine Z-section images, 0.9  $\mu\text{m}$  apart, taken through the cell to allow quantification of N positive puncta were concatenated in the Image J software to generate this animation.

**Supplementary video 2: A 3D projection of RSV IBs.** The concatenated z-stack imaging from supplementary video 1 were used to generate a 3D projection of RSV IBs, with 1 pixel spacers added between adjacent z-stacks to achieve the required 3D effect. The projection was performed in Image J software.
